23 <sup>9</sup>The University of Texas Graduate School of Biomedical Sciences at Houston, Houston, TX  
24 77030, USA

25 <sup>10</sup>Division of Infectious Diseases, Department of Internal Medicine, McGovern Medical School  
26 at The University of Texas Health Science Center, Houston, TX 77030, USA

27 <sup>11</sup>School of Pharmacy, University of Washington, Seattle, WA 98195, USA

28 <sup>12</sup>Department of Thoracic Head and Neck Medical Oncology, University of Texas MD Anderson  
29 Cancer Center, Houston, TX 77030, USA

30 <sup>13</sup>Department of Surgery, Houston Methodist Research Institute, Houston, TX 77030, USA

31 <sup>14</sup>Department of Radiation Oncology, Houston Methodist Research Institute, Houston, TX  
32 77030, USA

33 \*Corresponding authors:

34 Emails: [agrattoni@houstonmethodist.org](mailto:agrattoni@houstonmethodist.org) ; [mauroferrari.outsidehnh@gmail.com](mailto:mauroferrari.outsidehnh@gmail.com)

35

## 36 **Abstract**

37 Pre-exposure prophylaxis (PrEP) using antiretroviral oral drugs is effective at preventing HIV  
38 transmission when individuals adhere to the dosing regimen. Tenofovir alafenamide (TAF) is a  
39 potent antiretroviral drug, with numerous long-acting (LA) delivery systems under development  
40 to improve PrEP adherence. However, none has undergone preventive efficacy assessment. Here  
41 we show that LA TAF using a novel subcutaneous nanofluidic implant (nTAF) confers  
42 protection from HIV transmission. We demonstrate that sustained subcutaneous delivery through  
43 nTAF in rhesus macaques maintained tenofovir diphosphate concentration at a median of 390.00  
44 fmol/10<sup>6</sup> peripheral blood mononuclear cells, 9 times above clinically protective levels. In a non-  
45 blinded, placebo-controlled rhesus macaque study with repeated low-dose rectal SHIV<sub>SF162P3</sub>

46 challenge, the nTAF cohort had a 62.50% reduction in risk of infection per exposure compared  
47 to the control. Our finding mirrors that of tenofovir disoproxil fumarate (TDF) monotherapy,  
48 where 60.00% protective efficacy was observed in macaques, and clinically, 67% reduction in  
49 risk with 86.00% preventive efficacy in individuals with detectable drug in the plasma. Overall,  
50 our nanofluidic technology shows potential as a subcutaneous delivery platform for long-term  
51 PrEP and provides insights for clinical implementation of LA TAF for HIV prevention.

52

## 53 **INTRODUCTION**

54 The approval of Descovy® (200 mg emtricitabine [FTC]/25 mg tenofovir alafenamide [TAF]) as  
55 the second HIV pre-exposure prophylaxis (PrEP) medication, following Truvada® (200 mg  
56 FTC/300 mg tenofovir disoproxil fumarate [TDF]) is fueling global efforts to end the AIDS  
57 pandemic by 2030<sup>1</sup>. Compared to Truvada®, Descovy® offers safety advantages with lower  
58 systemic tenofovir (TFV) concentrations without compromising overall efficacy  
59 (NCT02842086)<sup>2</sup>. The efficacy of these agents to prevent sexual HIV infection is exceptional,  
60 provided that individuals strictly adhere to the dosing regimen<sup>3-5</sup>. According to the iPrEx study,  
61 seven doses of Truvada® per week correlated with 99% PrEP efficacy, whereas the rate dropped  
62 to 76% with two doses per week<sup>6</sup>. Motivated by challenges of pill fatigue and PrEP accessibility,  
63 various biomedical developments have emerged aiming at improving therapeutic adherence and  
64 expanding HIV PrEP implementation.

65

66 Long-acting (LA) antiretroviral (ARV) formulations and delivery systems offer systemic  
67 delivery for prolonged periods, obviating the need for frequent dosing. Currently, LA ARV  
68 strategies for HIV PrEP are largely geared towards developing single-agent drugs for prevention

69 instead of combinatorial formulations<sup>7-15</sup>. Focusing on a single drug allows for maximal drug  
70 loading, while minimizing injection volumes (for injectables). In the case of LA ARV implants,  
71 a single drug formulation affords smaller size dimensions for minimally-invasive and discreet  
72 implantation<sup>16,17</sup>. Importantly, single-agent LA ARVs offer benefits of cost-effectiveness as well  
73 as reduced complexity in terms of development. Of relevance, a single-agent injectable LA  
74 ARV, cabotegravir, is currently in clinical trials for PrEP efficacy evaluation (NCT02076178,  
75 NCT02178800, NCT02720094, NCT03164564)<sup>18,19</sup>. Thus far, islatravir (MK-8591) remains the  
76 only single-agent ARV LA ARV implant to reach clinical testing for safety and  
77 pharmacokinetics assessment<sup>20</sup>.

78  
79 Given the potency and safety advantages of TAF compared to TDF, numerous LA TAF  
80 strategies are under development involving biodegradable<sup>7-9</sup> or non-biodegradable<sup>12</sup> polymeric  
81 implants, transcutaneously refillable devices<sup>10</sup>, and an osmotic pump system<sup>11</sup>. While some LA  
82 TAF systems have achieved targeted preventive tenofovir diphosphate (TFV-DP) concentrations  
83 in peripheral blood mononuclear cells (PBMC) (40.0 fmol/10<sup>6</sup> cells)<sup>7,10,12</sup>, none has undergone  
84 efficacy studies for protection from HIV transmission. Thus, considering the concentrated  
85 research efforts on developing LA TAF systems, it is of utmost importance to evaluate the  
86 efficacy of LA TAF as a single-agent drug for HIV prevention.

87  
88 Here, we present the first efficacy study of LA TAF for HIV PrEP. We used a nonhuman primate  
89 (NHP) model of repeated low-dose rectal challenge with simian HIV<sub>SF162P3</sub> (SHIV<sub>SF162P3</sub>), which  
90 recapitulates human HIV transmission. We assessed the efficacy of sustained subcutaneous  
91 delivery of TAF via a novel nanofluidic (nTAF) implant as a single-agent PrEP regimen for

92 protection from SHIV<sub>SF162P3</sub> infection. We investigated the pharmacokinetics and biodistribution  
93 of TAF, as well as safety and tolerability of the implant.

## 94 **RESULTS**

### 95 **Nanofluidic implant assembly**

96 We leveraged a newly designed silicon nanofluidic membrane technology<sup>21</sup> for sustained drug  
97 elution independent of actuation or pumps. The nanofluidic membrane (6 mm × 6 mm with a  
98 height of 500 μm) is mounted within a medical-grade titanium drug reservoir (Fig. 1a). The  
99 nanofluidic membrane contains 199 circular microchannels, each measuring 200 μm in diameter  
100 and 490 μm in length. Hexagonally distributed in a circular configuration (Fig. 1b), each  
101 microchannel leads to 1400 parallel slit-nanochannels (Fig. 1c), for a total of 278,600  
102 nanochannels per membrane. The nanochannels (length 10 μm, width 6 μm) are densely packed  
103 in square arrays organized in circular patterns. The whole membrane surface is coated by an  
104 innermost layer consisting of silicon dioxide (SiO<sub>2</sub>), and a surface layer of silicon carbide (SiC),  
105 which provides biochemical inertness for long term implantable applications (Fig. 1d)<sup>22,23</sup>.

106  
107 Drug diffusion across the membrane is driven by concentration difference between the drug  
108 reservoir and the subcutaneous space. The drug is loaded in the implant in powder form and is  
109 continuously solubilized in the interstitial fluids penetrated within the implant via capillary  
110 wetting of the membrane. Drug release is determined by both nanochannels and drug  
111 solubilization kinetics. Within the nanochannels, diffusivity of drug molecules is defined by  
112 steric and electrostatic interactions with channel walls. The size of nanochannels is selected to  
113 saturate drug transport, rendering it steady and independent from the concentration gradient<sup>24,25</sup>.  
114 The release rate can be finely tuned by selecting the suitable number of nanochannels per

115 membrane<sup>26</sup>. Therefore, the nanofluidic membrane passively achieves constant and sustained  
116 drug delivery obviating the need of mechanical components<sup>27,28</sup>.

117  
118 In this study, based on the molecular size and physicochemical properties of TAF, we used the  
119 nanochannels size of ~190 nm. PrEP implants were loaded with solid powder TAF (nTAF),  
120 while control implants were loaded with phosphate buffered saline (nPBS). Membrane stability  
121 was evaluated after 4 months of subcutaneous implantation via scanning electron microscopy  
122 (SEM) (Fig. 1e and f) along with atomic force microscopy (AFM) (Fig. 1g) and energy  
123 dispersive x-ray spectroscopy (EDX) (Fig. 1h). We observed similar surface morphology by  
124 AFM for the nTAF and nPBS membranes, with a non-statistically-significant increase in  
125 roughness in the nPBS membrane. The EDX showed the same abundance of elements at the  
126 surface in both membranes, indicating that TAF does not alter the membrane composition. These  
127 results demonstrate that TAF does not affect membrane stability even after prolonged  
128 implantation.

129  
130 Short-term *in vitro* drug release from nTAF showed a linear cumulative release of  $27.53 \pm 1.36$   
131 mg of TAF over 10 days (Fig. 1i). However, an increase of TAF degradation products was  
132 observed throughout the study, attributable to decrease in TAF stability (Supplementary Fig. 1).

133

#### 134 **nTAF pharmacokinetic profile in NHP**

135 For *in vivo* evaluation of pharmacokinetic (PK) and PrEP efficacy, rhesus macaques were  
136 subcutaneously implanted with either nTAF (n=8) or control nPBS (n=6) in the dorsum for 4  
137 months. We used TFV-DP concentration in PBMC of  $100.00 \text{ fmol}/10^6$  cells as the benchmark

138 prevention target, which exceeds the clinically protective level in the iPrEX trial<sup>6,7</sup>. Preventive  
139 TFV-DP PBMC concentrations were surpassed one day post-implantation (median, 213.00  
140 fmol/10<sup>6</sup> cells; IQR, 140.00 to 314.00 fmol/10<sup>6</sup> cells) and maintained at a median of 390.00  
141 fmol/10<sup>6</sup> cells (IQR, 216.50 to 585.50 fmol/10<sup>6</sup> cells) for 4 months (Fig. 2a). During the washout  
142 period, TFV-DP PBMC concentrations decreased to below the limit of quantitation (BLOQ)  
143 within 6 weeks of device retrieval.

144  
145 Plasma TFV concentrations were consistently higher than plasma TAF for the duration of the PK  
146 study (Fig. 2b). Notably, TFV concentrations increased as TAF concentrations decreased,  
147 beginning at the 3-month time point. This is attributable to the limited stability of TAF and  
148 degradation to TFV within the implant, as was observed *in vitro* (Supplementary Fig. 1). Plasma  
149 TAF and TFV levels (median, 0.51; IQR, 0.30 to 0.91 ng/mL; and median, 7.81; IQR, 6.17 to  
150 9.97 ng/mL, respectively) were within range of that achieved with oral TAF dosing of NHP<sup>29</sup>.  
151 Within a week post-device retrieval, TAF and TFV concentrations were BLOQ.

152  
153 Estimated half-life ( $t_{1/2}$ ) PK of TAF and TFV were below  $1.87 \pm 0.32$  and  $1.84 \pm 0.63$  days,  
154 respectively, as BLOQ was achieved in under a week (Table 1). Individual TFV-DP  
155 concentrations for each animal were fitted to an intravenous bolus injection two-compartment  
156 model (Supplementary Fig. 2a-d). During the washout period, TFV-DP PBMC concentrations  
157 had an average first-order elimination rate constant of  $0.14 \pm 0.028$  days<sup>-1</sup>.

158  
159 We measured TFV-DP concentrations after device retrieval (n=4) (Fig. 2c) and after the washout  
160 period (n=3) (Fig. 2d) in tissues relevant to HIV-1 transmission or viral reservoirs. Specifically,

161 we assessed cervix, urethra, rectum, tonsil, liver, spleen, axillary lymph nodes (ALN),  
162 mesenteric lymph nodes (MLN), inguinal lymph nodes (ILN), and cervical lymph nodes (CLN).  
163 Drug penetration from subcutaneous TAF delivery was observed at varying levels in all tissues  
164 after device retrieval (Fig. 2c). After the two-month washout period, TFV-DP concentrations  
165 were quantifiable in the tonsil, spleen and lymph nodes (Fig. 2d) and BLOQ in tissues highly  
166 associated with HIV-1 transmission, specifically the cervix and rectum. TFV-DP concentrations  
167 in the tonsil were above 75.00 fmol/mg, suggestive of longer clearance or better penetration.

168

### 169 **nTAF efficacy protection against virus**

170 We next assessed whether sustained nTAF delivery as a subcutaneously delivered monotherapy  
171 could protect the macaques against rectal SHIV<sub>SF162P3</sub> infection. Prior to rectal challenge, the  
172 animals were subjected to a two-week “conditioning phase” (Fig. 3a) to allow for reaching the  
173 target preventive intracellular TFV-DP PBMC concentrations of 100.00 fmol/10<sup>6</sup> cells (Fig. 2a).  
174 Animals in both PrEP and control cohorts were rectally challenged weekly with low-dose  
175 SHIV<sub>SF162P3</sub> for up to 10 inoculations and continually monitored for drug PK throughout the  
176 study (Fig. 3a). The SHIV inoculation dosage used are similar to human semen HIV RNA levels  
177 during acute viremia, thus recapitulating high-risk or acute HIV infection in humans. Therefore,  
178 this animal model is considered more aggressive, as the risk of infection per exposure markedly  
179 exceeds the risk in clinical settings<sup>30</sup>.

180

181 To monitor for SHIV<sub>SF162P3</sub> infection, we evaluated weekly cell-free viral RNA in the plasma.  
182 Rectal challenges were stopped upon initial detection of plasma viral RNA, which was  
183 confirmed after a consecutive positive assay. Two of eight macaques from the nTAF group



184 (25.00%) were uninfected after 10 weekly rectal SHIV<sub>SF162P3</sub> challenges (Fig. 3b). Using a  
185 discrete-time transmission probability model, the nTAF group had a reduced risk of infection  
186 per-exposure of 62.50%, in comparison to the control group. However, our result did not reach  
187 significance ( $p=0.068$  by Fisher's exact test relative risk), possibly attributable to the small  
188 sample size. Notably, prophylaxis with nTAF increased the median time to infection to 5  
189 challenges compared to 2 challenges in the control cohort. After device explantation, there was  
190 no spike in viremia, indicative of PrEP efficacy of nTAF monotherapy in the two uninfected  
191 animals. While Kaplan-Meier analysis demonstrated delayed and reduced infection in some  
192 animals, there was no statistical significance ( $p=0.073$  by Mantel-Cox test) between nTAF and  
193 nPBS groups.

194  
195 TAF-treated infected NHPs had blunted SHIV RNA peak viremia (median;  $3.80 \times 10^4$  vRNA  
196 copies/mL; IQR,  $1.60 \times 10^3$  to  $2.09 \times 10^5$  vRNA copies/mL) in comparison to control groups  
197 (median;  $3.01 \times 10^5$  vRNA copies/mL; IQR,  $9.00 \times 10^3$  to  $7.25 \times 10^6$  vRNA copies/mL) (Fig.  
198 3c). However, differences in SHIV RNA levels at initial detection were not statistically  
199 significant between control and infected PrEP animals ( $p=0.18$  by Mann-Whitney test).

200  
201 At euthanasia, we assessed the residual SHIV infection in various tissues collected from the  
202 nTAF cohort by measuring cell-associated SHIV<sub>SF162P3</sub> provirus DNA (Fig. 3d). Tissues from  
203 PrEP 1-4 were assessed after 4 months of nTAF implantation, and after 2 months of drug  
204 washout for PrEP 5-7. SHIV DNA was detectable in the MLN in 4/5 of the infected PrEP NHPs.  
205 Animals PrEP 5 (infected) and PrEP 6 and 7 (uninfected), had no detectable SHIV DNA in any  
206 of the tissues analyzed.

207

## 208 **Drug stability in vivo within nTAF**

209 To evaluate drug stability in nTAF after 4 months of *in vivo* implantation, we extracted residual  
210 contents from the implant and analyzed for TAF and its hydrolysis products (TAF\*) (Table 2).  
211 Residual drug within the implant ranged 30.75 – 71.12% of the initial loaded amount. Further,  
212 TAF\* within the implant was predominantly composed of TAF hydrolysis products, including  
213 TFV, with TAF stability ranging 18.21 - 43.08%. Therefore, augmented TAF hydrolysis to TFV  
214 within the implant most likely contributed to increased TFV levels observed in plasma towards  
215 the end of the study. The nTAF implants had a mean release rate of  $1.40 \pm 0.39$  mg/day, which  
216 was sufficient to sustain intracellular TFV-DP concentrations above 100.00 fmol/10<sup>6</sup> PBMCs  
217 throughout the duration of the study.

218

## 219 **nTAF safety and tolerability in NHP**

220 To assess nTAF safety and tolerability, we histologically examined the tissue surrounding the  
221 implants through immunohistochemical analysis (Fig. 4a). Specifically, we evaluated the fibrotic  
222 capsule in contact with either the titanium reservoir (Fig. 4b) or TAF-eluting nanofluidic  
223 membrane (Fig. 4c and d). Histological analysis via hematoxylin and eosin (H&E) demonstrated  
224 foreign-body response, which is typical of medical implants. The surrounding subcutaneous  
225 tissue and underlying skeletal muscle was healthy with limited necrosis in the fibrotic capsule.  
226 While fibrotic capsules exhibited cellular infiltration, they were negative for inflammatory cell  
227 marker CD45 (Fig. 4e). DAPI staining demonstrated healthy nuclei in the areas with increased  
228 cellular infiltration. Further, analysis of the fibrotic area in contact with TAF-releasing

229 membrane via acid-fast bacteria (AFB) (Fig. 4f) and Grocott methenamine silver staining (Fig.  
230 4g), which evaluates for presence of bacteria and fungi, respectively, were negative.

231  
232 In parallel, as a control, the tissue surrounding nPBS implants were histologically assessed (Fig.  
233 4h), specifically the fibrotic capsule (Fig. 4i, j and k), which was thinner and denser than the  
234 nTAF. Similarly, the tissue surrounding the control implant was negative for CD45 cells (Fig.  
235 4l), bacteria (Fig. 4m) or fungi (Fig. 4n). While other groups have reported that TAF induced  
236 necrosis at sites of implantation<sup>12</sup>, overall our results showed no cellular damage or aberrant  
237 inflammatory cell influx, indicative of implant tolerability.

238  
239 As TFV is implicated in nephrotoxicity and hepatotoxicity, we evaluated the kidney and liver in  
240 the animals with nTAF implants. The kidney of an untreated NHP from a prior study was used as  
241 a historical control, because nPBS NHPs were transferred to another study after infection.  
242 Histological assessment of the kidney from nTAF cohort via H&E analysis (Fig. 4o) did not  
243 demonstrate necrosis or signs of damage, in comparison to control (Fig. 4p). Further, creatinine  
244 levels were within normal limits throughout the study, suggesting that there was no detectable  
245 kidney damage in the nTAF cohort (Fig. 4q). Liver enzymes were monitored as surrogate  
246 markers for health; aspartate aminotransferase (AST) (Fig. 4r), and alanine aminotransferase  
247 (ALT) (Fig. 4s) measurements were within normal levels with respect to baseline values pre-  
248 nTAF implantation. Metabolic panel, complete blood count and urinalysis results were also  
249 within normal levels (Supplementary Fig. 3a-v, 4a-n, Supplementary Table 1).

250

251 **DISCUSSION**

252 This work represents the first ever preventive efficacy assessment of an implantable LA ARV  
253 platform and the foremost study of LA TAF as a single agent HIV PrEP regimen. Our finding  
254 that nTAF protected from SHIV infection with 62.50% reduction in risk of infection per  
255 exposure resembles that of TAF predecessor, tenofovir disoproxil fumarate (TDF). TDF  
256 monotherapy resulted in 60.00% protective efficacy in macaques<sup>31</sup>, but clinically achieved 67%  
257 risk reduction and 86.00% preventive efficacy in individuals with detectable plasma tenofovir<sup>3,32</sup>.

258  
259 Most clinical studies evaluating PrEP adherence use plasma, PBMC or dried blood spots as  
260 surrogate markers to local tissue concentrations<sup>3,6,32,33</sup>. However, breakthrough infection has  
261 occurred in individuals with high systemic drug concentrations, similar to the infected nTAF  
262 animals in our study. Therefore, it remains unclear if infection in some animals in our study  
263 could be attributable to inadequate TFV-DP concentrations in the site of viral transmission. In a  
264 study of weekly oral TAF as a single-agent PrEP against vaginal SHIV infection by the Center  
265 for Disease Control, TFV-DP PBMC levels were similar between the four infected and five  
266 uninfected animals<sup>29</sup>. However, only five out of nine animals had detectable vaginal TFV-DP  
267 concentrations (5 fmol/mg) prior to challenge<sup>29</sup>. It is also of interest to identify the turn-over rate  
268 of “TFV-DP positive” to “TFV-DP naïve” mononuclear cells systemically and locally at the site  
269 of transmission to improve dosing regimens. Garcia-Lerma et. al demonstrated that once weekly  
270 oral TAF dosing conferred low protection from HIV transmission, despite high systemic (>1000  
271 fmol/10<sup>6</sup> PBMC) and rectal (median, 377 fmol/10<sup>6</sup> mononuclear cells) TFV-DP levels<sup>34</sup>.  
272 However, in this study the animals were rectally challenged 3 days after the first weekly oral  
273 TAF dose. Thus, the long interval between drug dosing and virus exposure could have allowed  
274 for TFV-DP naïve mononuclear cells to repopulate at the site of transmission. Of relevance, on-

275 demand local TFV delivery at HIV transmission sites, such as a TFV rectal douche, has shown to  
276 achieve high local tissue concentrations and favorable PK profiles in NHP with SHIV  
277 challenges<sup>35,36</sup>. Therefore, we posit that PrEP efficacy could plausibly be improved if first-line  
278 target cells have sufficient TFV-DP concentrations prior to virus exposure.

279  
280 The present study was limited by the number of animals and the use of both sexes for rectal  
281 SHIV prevention. Future studies could address this issue by increasing the sample size and  
282 conducting separate sexes studies to evaluate protection against rectal or vaginal exposure.  
283 Further, because Descovy® is clinically approved for oral administration, scientific rigor could  
284 be strengthened with an additional group with daily oral TAF dosing as opposed to weekly  
285 dosing as performed in literature, in comparison to sustained subcutaneous delivery.

286  
287 In summary, our innovative strategy of continuous low-dose systemic delivery of TAF obviates  
288 adherence challenges and provides similar protective benefit to that observed with oral TDF.  
289 Taken together, this work provides optimism for implementing clinical studies to assess the  
290 safety and efficacy of LA TAF platforms for HIV PrEP.

291

## 292 **METHODS**

293

### 294 **Nanofluidic implant assembly**

295 Medical-grade 6AI4V titanium oval drug reservoirs were specifically designed and manufactured  
296 for this study. Briefly, a nanofluidic membrane possessing 278,600 nanochannels (mean; 194  
297 nm) was mounted on the inside of the sterile drug reservoir as described previously<sup>13</sup>. Detailed

298 information regarding the membrane structure and fabrication was described previously<sup>26,37</sup>.  
299 Implants were welded together using Arc welding. PrEP implants were loaded with ~300 - 457  
300 mg TAF fumarate using a funnel in the loading port, while control implants were left empty. A  
301 titanium piece that resembled a small nail was inserted into the loading port and welded shut.  
302 Implants were primed for drug release through the nanofluidic membrane by placing implants in  
303 1 X Phosphate Buffered Saline (PBS) under vacuum. This preparation method resulted in  
304 loading of control implants with PBS. Implants were maintained in sterile 1X PBS in a  
305 hermetically sealed container until implantation shortly after preparation. TAF was kindly  
306 provided by Gilead Sciences.

307

#### 308 **In vitro release from nanofluidic implant**

309 Medical-grade 6Al4V titanium circular drug reservoirs (n=5) were assembled as described  
310 above, loaded with 100.00 mg TAF fumarate and placed in sink solution of 20 mL 1 × PBS with  
311 constant agitation at 37°C. For analysis, the entire sink solution was retrieved and replaced with  
312 fresh PBS every other day for 10 days. High-performance liquid chromatography (HPLC)  
313 analysis was performed on an Agilent Infinity 1260 system equipped with a diode array and  
314 evaporative light scattering detectors using a 3.5- $\mu$ m 4.6 × 100 mm Eclipse Plus C18 column and  
315 water/methanol as the eluent and 25  $\mu$ L injection volume. Peak areas were analyzed at 260 nm  
316 absorbance.

317

#### 318 **Nanofluidic membrane assessment**

319 Silicon nanofluidic membranes structure and composition was assessed using different imaging  
320 techniques at the Microscopy – SEM/AFM core of the Houston Methodist Research Institute

321 (HMRI), Houston, TX, USA. Inspection of structural conformation was performed via scanning  
322 electron microscopy (SEM; Nova NanoSEM 230, FEI, Oregon, USA), nanochannel dimension  
323 was measured on membrane cross sections obtained using gallium ion milling (FIB, FEI 235).  
324 Surface roughness was measured by atomic force microscopy (AFM Catalyst), surface chemical  
325 composition was evaluated with Energy-dispersive X-ray spectroscopy (EDAX, Nova NanoSEM  
326 230).

327

### 328 **Animals and animal care**

329 All animal procedures were conducted at the AAALAC-I accredited Michale E. Keeling Center  
330 for Comparative Medicine and Research, The University of Texas MD Anderson Cancer Center  
331 (UTMDACC), Bastrop, TX. All animal experiments were carried out according to the provisions  
332 of the Animal Welfare Act, PHS Animal Welfare Policy, and the principles of the NIH Guide for  
333 the Care and Use of Laboratory Animals. All procedures were approved by the Institutional  
334 Animal Care and Use Committee at UTMDACC. Indian rhesus macaques (*Macaca mulatta*;  
335 n=14; 6 males and 8 females) of 2-4 years and 2-5 kg bred at this facility were used in the study.  
336 All procedures were performed under anesthesia with ketamine (10 mg/kg, intramuscular) and  
337 phenytoin/pentobarbital (1 mL/10 lbs, intravenous [IV]).

338

339 All animals had access to clean, fresh water at all times and a standard laboratory diet. Prior to  
340 the initiation of virus inoculations, compatible macaques were pair-housed. Once inoculations  
341 were initiated, the macaques were separated into single housing (while permitting eye contact) to  
342 prevent the possibility of SHIV transmission between the macaques. Euthanasia of the macaques  
343 was accomplished in a humane manner (IV pentobarbital) by techniques recommended by the

344 American Veterinary Medical Association Guidelines on Euthanasia. The senior medical  
345 veterinarian verified successful euthanasia by the lack of a heartbeat and respiration.

346

### 347 **Minimally invasive implantation procedure**

348 An approximately 1-cm dorsal skin incision was made on the right lateral side of the thoracic  
349 spine. Blunt dissection was used to make a subcutaneous pocket ventrally about 5 cm deep. The  
350 implant was placed into the pocket with the membrane facing the body. A simple interrupted  
351 tacking suture of 4-0 polydioxanone (PDS) was placed in the subcutaneous tissue to help close  
352 the dead space and continued intradermally to close the skin. All animals received a single  
353 50,000 U/kg perioperative penicillin G benzathine/penicillin G procaine (Combi-Pen) injection  
354 and subcutaneous once-daily meloxicam (0.2 mg/kg on day 1 and 0.1 mg/kg on days 2 and 3) for  
355 postsurgical pain.

356

### 357 **Blood collection and plasma and PBMC sample preparation**

358 All animals had weekly blood draws to assess plasma TAF and TFV concentrations, intracellular  
359 TFV-DP PBMC concentrations, plasma viral RNA loads, and cell-associated SHIV DNA in  
360 PBMCs. Blood collection and sample preparation were performed as previously described<sup>10</sup>.  
361 Blood was collected in EDTA-coated vacutainer tubes before implantation; on days 1, 2, 3, 7, 10,  
362 and 14; and then once weekly until euthanasia. Plasma was separated from blood by  
363 centrifugation at  $1200 \times g$  for 10 min at 4 °C and stored at -80 °C until analysis. The remaining  
364 blood was used for PBMC separation by standard Ficoll-Hypaque centrifugation. Cell viability  
365 was > 95%. After cells were counted, they were pelleted by centrifugation at  $400 \times g$  for 10 min,  
366 resuspended in 500  $\mu$ L of cold 70% methanol/30% water, and stored at -80 °C until further use.



367

368 **Pharmacokinetic analysis of TFV-DP in PBMC and TAF and TFV in plasma**

369 The PK profiles of TFV-DP in PBMC and TAF and TFV in plasma were evaluated throughout  
370 the 4 months of nTAF implantation. Due to early implant removal in one animal on day 43,  
371 seven animals were evaluated for drug PK. After device explantation, drug washout was assessed  
372 for an additional 2 months (n=3).

373

374 Intracellular TFV-DP concentrations in PBMCs were quantified using previously described  
375 validated liquid chromatographic-tandem mass spectrometric (LC-MS/MS) analysis<sup>6,38</sup>. The  
376 assay was linear from 5 to 6000 fmol/sample. Typically, 25 fmol/sample was used as the lower  
377 limit of quantitation (LLOQ). If additional sensitivity was needed, standards and quality controls  
378 were added down to 5 fmol/samples, as previously described<sup>38</sup>. Day 21 TFV-DP concentrations  
379 were omitted due to PBMC count below threshold.

380

381 Plasma TAF and TFV concentrations were quantified using a previously described LC-MS/MS  
382 assay<sup>39</sup>. Drugs were extracted from 0.1 mL plasma via solid phase extraction; assay lower limits  
383 of quantitation for TAF and TFV were 0.03 ng/mL and 1 ng/mL, respectively. The multiplexed  
384 assay was validated in accordance with FDA, Guidance for Industry: Bioanalytical Method  
385 Validation recommendations<sup>40</sup>.

386

387 **Tissue TFV-DP quantification**

388 Lymphoid tissues (mesenteric, axillary, and inguinal lymph nodes), rectum, urethra, cervix,  
389 tonsil, spleen, liver, and adipose tissue were homogenized, and 50- to 75-mg aliquots were used

390 for TFV-DP quantitation. Pharmacokinetic analysis of TFV-DP was conducted by the Clinical  
391 Pharmacology Analytical Laboratory at the Johns Hopkins University School of Medicine. TFV  
392 concentrations in aforementioned tissue biopsies were determined via LC-MS/MS analysis.  
393 TFV-DP was measured using a previously described indirect approach, in which TFV was  
394 quantitated following isolation of TFV-DP from homogenized tissue lysates and enzymatic  
395 conversion to the TFV molecule<sup>38</sup>. The assay LLOQ for TFV-DP in tissue was 5 fmol/sample,  
396 and drug concentrations were normalized to the amount of tissue analyzed<sup>41</sup>. The TFV-DP tissue  
397 was validated in luminal tissue (rectal and vaginal tissue) in accordance with FDA, Guidance for  
398 Industry: Bioanalytical Method Validation recommendations<sup>40</sup>; alternative tissue types were  
399 analyzed using this method.

400

#### 401 **PrEP nTAF efficacy against rectal SHIV challenge**

402 To study the efficacy of the PrEP implant against SHIV transmission, animals were divided into  
403 two groups, PrEP nTAF-treated [n=8; 4 male (M) and 4 female (F)] or control nPBS (n=6; 3 M  
404 and 3 F), in a non-blinded study. The PrEP regimen consisted of subcutaneously implanted  
405 nTAF for sustained drug release over 112 days. The efficacy of nTAF in preventing rectal SHIV  
406 transmission was evaluated using a repeat low-dose exposure model described previously<sup>31,34,42</sup>.  
407 Animals were considered protected if they remained negative for SHIV RNA throughout the  
408 study. Briefly, after PrEP-treated macaques achieved intracellular TFV-DP concentrations above  
409 100.00 fmol/10<sup>6</sup> PBMCs, both groups were rectally exposed to SHIV<sub>SF162P3</sub> once a week for up  
410 to 10 weeks until infection was confirmed by two positive plasma viral RNA loads. The  
411 SHIV<sub>SF162P3</sub> dose was equivalent to HIV-1 RNA levels found in human semen during acute  
412 viremia<sup>42</sup>.

413  
414 Challenge stocks of SHIV<sub>162p3</sub> were generously supplied by Dr. Nancy Miller, Division of AIDS,  
415 NIAID, through Quality Biological (QBI), under Contract No. HHSN272201100023C to the  
416 Vaccine Research Program, Division of AIDS, NIAID. The stock SHIV<sub>162p3</sub> R922 derived  
417 harvest 4 dated 9/16/2016 (p27 content 173.33 ng/ml, viral RNA load >10<sup>9</sup> copies/ml,  
418 TCID<sub>50</sub>/ml in rhesus PBMC 1280) was diluted 1:300 and 1ml of virus was used for rectal  
419 challenge each time.

420  
421 For the challenge, the animals were positioned in prone position and virus was inoculated  
422 approximately 4 cm into the rectum. Inoculated animals were maintained in the prone position  
423 with the perineum elevated for 20 minutes to ensure that virus did not leak out. Care was also  
424 taken to prevent any virus from contacting the vagina area and to not abrade the mucosal surface  
425 of the rectum.

426  
427 **Infection monitoring by SHIV RNA in plasma and SHIV DNA in tissues**

428 Infection was monitored by the detection of SHIV RNA in plasma using previously described  
429 methods<sup>43,44</sup> with modification. Viral RNA (vRNA) was isolated from blood plasma using the  
430 Qiagen QIAmp UltraSense Virus Kit (Qiagen #53704) in accordance with manufacturer's  
431 instructions for 0.5 mL of plasma. vRNA levels were determined by quantitative real-time PCR  
432 (qRT-PCR) using Applied Biosystems<sup>TM</sup> TaqMan<sup>TM</sup> Fast Virus 1-Step Master Mix  
433 (Thermofisher #4444432) and a primer-probe combination recognizing a conserved region of  
434 gag (GAG5f: 5'-ACTTTCGGTCTTAGCTCCATTAGTG-3'; GAG3r: 5'-  
435 TTTTGCTTCCTCAGTGTGTTTCA-3'; and GAG1tq: FAM 5'-

436 TTCTCTTCTGCGTGAATGCACCAGATGA-3'TAMRA). Each 20 µl reaction contained 900  
437 nM of each primer and 250 nM of probe, and 1x Fast Virus 1-Step Master Mix, plasma-derived  
438 vRNA sample, SIV gag RNA transcript containing standard, or no template control.

439  
440 qRT-PCR was performed in a ABI Step One Plus Cycler. PCR was performed with an initial  
441 step at 50°C for 5 min followed by a second step at 95°C for 20 sec, and then 40 cycles of 95°C  
442 for 15 sec and 60°C for 1 min. Ten-fold serial dilutions (1 to 1 x 10<sup>6</sup> copies per reaction) of an in  
443 vitro transcribed SIV gag RNA were used to generate standard curves. Each sample was tested  
444 in duplicate reactions. Plasma viral loads were calculated and shown as viral RNA copies/mL  
445 plasma. The limit of detection is 50 copies/ml. Infections were confirmed after a consecutive  
446 positive plasma viral load measurement.

447  
448 To detect viral DNA in tissue samples, total DNA was isolated from PBMCs or tissue specimens  
449 using the Qiagen DNeasy Blood & Tissue Kit (Qiagen #69504) according to the manufacturer's  
450 protocol. DNA was quantified using a nanodrop spectrophotometer. qRT-PCR was performed  
451 using the SIV gag primer probe set described above. Each 20 µl reaction contained 900 nM of  
452 each primer and 250 nM of probe, and 1x TaqMan Gene Expression Master Mix (Applied  
453 Biosystems, Foster City, CA), macaque-derived DNA sample, SIV gag DNA containing  
454 standard, or no template control. PCR was initiated in with an initial step of 50°C for 2 min and  
455 then 95°C for 10 min. This was followed by 40 cycles of 95°C for 15 sec, and 60°C for 1 min.  
456 Each sample was tested in triplicate reactions. Ten-fold serial dilutions of a SIV gag DNA  
457 template (1 to 1 x 10<sup>5</sup> per reaction) were used to generate standard curves. The limit of detection  
458 of this assay was determined to be 1 copy of SIV gag DNA.

459

#### 460 **Device retrieval and macaque euthanasia**

461 A subset of PrEP-treated macaques (n=4), those with the highest viral load, were euthanized on  
462 day 112, while implants were retrieved on day 112 from the remaining PrEP-treated macaques  
463 (n=3) for continuation to a 2-month drug-washout period before euthanasia. SHIV-infected  
464 macaques in the control group (n=6) were transferred to another study (data not shown) and  
465 euthanized 28 days later. The implant was retrieved with a small incision in the skin and stored at  
466 -80 °C until further analysis. Skin within a 2-cm margin surrounding the implant was excised  
467 from euthanized macaques and fixed in 10% buffered formalin for histological analysis.  
468 Macaques continuing in the washout period underwent a skin punch biopsy of the subcutaneous  
469 pocket, and the skin incision was sutured with a simple interrupted tacking suture of 4-0 PDS;  
470 the specimen was fixed in 10% buffered formalin for histological analysis. The following tissues  
471 were collected from all animals at euthanasia (n=13): lymphoid tissues (mesenteric, axillary, and  
472 inguinal lymph nodes), rectum, urethra, cervix, tonsil, spleen, liver, and adipose tissue. Tissues  
473 were snap-frozen and stored at -80 °C until further analysis of TAF concentrations, viral RNA  
474 loads, and cell-associated SHIV DNA.

475

#### 476 **Residual drug and nanofluidic membrane retrieval from explanted implants**

477 Upon explantation, the implants were snap frozen with liquid nitrogen to preserve residual drug  
478 for stability analysis. For residual drug retrieval, the implants were thawed at 4°C overnight. A  
479 hole was drilled on the outermost corner on the back of the implant using a 3/64 titanium drill bit  
480 with a stopper. Drilling was performed on the back of the implant and distal to the membrane to  
481 avoid damage. Following drilling, 20 µL sample from the implant drug reservoir was aliquoted

482 into respective 1.5 mL Eppendorf tubes with 0.5 mL 100% ethanol using a pipette. The implants  
483 were placed in 50 mL conical tubes with 40.0 g 70% ethanol. Each implant was flushed using a  
484 19-gauge needle with 70% ethanol from the sink solution. For sterilization, the implants were  
485 incubated in 70% ethanol for 4 days and transferred to new conical tubes with fresh 70% ethanol  
486 for an additional 4 days. To ensure nanochannel membranes were dry, the implants were  
487 transferred to new conical tubes with 100% ethanol for a day and placed in 6-well plates to dry  
488 under vacuum. To protect the membrane during machining procedure, electrical tape was placed  
489 over the outlets. The implants were opened using a rotary tool with a diamond wheel. Titanium  
490 dust from machining procedure was gently cleaned from membrane with a cotton swab and 70%  
491 ethanol. To remove membrane from the implant, a drop of nitric acid (Trace Metal grade) was  
492 placed on the membrane overnight and rinsed with Millipore water the next day. Membranes  
493 were kept in hermetically sealed containers until analysis.

494

#### 495 **TAF stability analysis in drug reservoir**

496 Liquid in the drug reservoir after explantation was collected with a pipette and diluted 25 times  
497 with 100% ethanol. The samples were transferred to 0.2  $\mu\text{m}$  nylon centrifugal filters and  
498 centrifuged at 500 G for 8 minutes at room temperature. An aliquot of 50  $\mu\text{L}$  from the filtered  
499 samples were further diluted in 100  $\mu\text{L}$  100% ethanol. HPLC analysis was performed on an  
500 Agilent Infinity 1260 system equipped with a diode array and evaporative light scattering  
501 detectors using a 3.5- $\mu\text{m}$  4.6  $\times$  100 mm Eclipse Plus C18 column and water/methanol as the  
502 eluent and 25  $\mu\text{L}$  injection volume. Peak areas were analyzed at 260 nm absorbance.

503

504 Drug solids from within the implant were analyzed from the initial 40.0 g 70% ethanol sink  
505 solution. The samples were transferred to 0.2  $\mu\text{m}$  nylon centrifugal filter and centrifuged at 500  
506 G for 8 minutes at room temperature. An aliquot of 10  $\mu\text{L}$  from the filtered samples was further  
507 diluted in 990  $\mu\text{L}$  of deionized water. UV-vis spectroscopy was performed on a Beckman  
508 Coulter DU® 730 system. Peak areas were analyzed at 260 nm absorbance.

509

### 510 **Assessment of PrEP nTAF safety and tolerability**

511 Tissues were fixed in 10% buffered formalin and stored in 70% ethanol until analysis. Tissues  
512 were then embedded in paraffin, cut into 5  $\mu\text{m}$  sections and stained with hematoxylin and eosin  
513 (H&E) staining at the Research Pathology Core HMRI, Houston, TX, USA. H&E staining was  
514 performed on tissue sections surrounding the implant site and kidney. Histological assessment  
515 was performed by a blinded pathologist. For immunohistochemistry evaluation of tissue  
516 sections, slides were stained with anti-CD45 conjugated to fluorescein isothiocyanate  
517 (Pharmingen). For negative controls, corresponding immunoglobulin and species (IgG)-matched  
518 isotype control antibodies were used. Nonspecific binding in sections was blocked by a 1-hour  
519 treatment in tris-buffered saline (TBS) plus 0.1% w/v Tween containing defatted milk powder  
520 ( $30\text{ mg ml}^{-1}$ ). Stained sections were mounted in Slow Fade GOLD with 4',6-diamidino-2-  
521 phenylindole (DAPI) (Molecular Probes, OR) and observed using a Nikon T300 Inverted  
522 Fluorescent microscope (Nikon Corp., Melville, NY). For verification of cell phenotype, each  
523 slide was scored by counting three replicate measurements by the same observer for each slide.  
524 All slides were counted without knowledge of the cell-specific marker being examined, and  
525 results were confirmed through a second reading by another observer.

526

527 **Assessment of TAF toxicity**

528 To assess TAF toxicity, a comprehensive metabolic panel was analyzed for each animal weekly  
529 during the rectal challenge phase of the study and biweekly afterward. Urine and CBCs were  
530 analyzed monthly to assess kidney and liver function and monitor the well-being of the NHPs.

531

532 **Statistical analysis**

533 Plasma  $t_{1/2}$  PK analysis was performed in Microsoft Excel using 2 time points, days 112 and 119.

534 Results were expressed as actual  $t_{1/2}$  is less than obtained  $t_{1/2}$  (because day 119 values were  
535 undetectable and were substituted with BLOQ values). PBMC PK analysis was performed using  
536 PKSolver add-in for Microsoft Excel developed by Zhang et al. <sup>45</sup>. The exact log-rank test was  
537 used for a discrete-time survival analysis of the PrEP and control groups, with use of the number  
538 of inoculations as the time variable. Inferences regarding the per-exposure effect of TAF were  
539 based on a discrete-time transmission probability model that assumed that the probability of  
540 infection is independent of the number of prior exposures. All statistical analysis for calculation  
541 of the efficacy of TAF were performed with GraphPad Prism 8 (version 8.1.1; GraphPad  
542 Software, Inc., La Jolla, CA). Data are represented as mean  $\pm$  SD and interquartile range (IQR)  
543 between the first (25<sup>th</sup> percentile) and third (75<sup>th</sup> percentile) quartiles.

544

545 The authors declare that all data supporting the findings of this study are available within the  
546 paper (and its supplementary information files). Source data for figures and table 2 are provided  
547 with the paper.

548

549 **REFERENCES**



- 550 1. UNAIDS. 90-90-90 An ambitious treatment target to help end the AIDS epidemic. 1–40  
551 [http://www.unaids.org/sites/default/files/media\\_asset/90-90-90\\_en.pdf](http://www.unaids.org/sites/default/files/media_asset/90-90-90_en.pdf) (2014).
- 552 2. Ray, A. S., Fordyce, M. W. & Hitchcock, M. J. M. Tenofovir alafenamide: A novel  
553 prodrug of tenofovir for the treatment of Human Immunodeficiency Virus. *Antiviral Res.*  
554 **125**, 63–70 (2016).
- 555 3. Baeten, J. M. *et al.* Antiretroviral Prophylaxis for HIV Prevention in Heterosexual Men  
556 and Women. *N. Engl. J. Med.* **367**, 399–410 (2012).
- 557 4. Grant, R. M. *et al.* Preexposure Chemoprophylaxis for HIV Prevention in Men Who Have  
558 Sex with Men. *N. Engl. J. Med.* **363**, 2587–2599 (2010).
- 559 5. Cohen, M. S. *et al.* Prevention of HIV-1 Infection with Early Antiretroviral Therapy. *N.*  
560 *Engl. J. Med.* **365**, 493–505 (2011).
- 561 6. Anderson, P. L. *et al.* Emtricitabine-Tenofovir Concentrations and Pre-Exposure  
562 Prophylaxis Efficacy in Men Who Have Sex with Men. *Sci. Transl. Med.* **4**, 151ra125-  
563 151ra125 (2012).
- 564 7. Gunawardana, M. *et al.* Pharmacokinetics of long-acting tenofovir alafenamide (GS-7340)  
565 subdermal implant for HIV prophylaxis. *Antimicrob. Agents Chemother.* AAC-00656  
566 (2015).
- 567 8. Schlesinger, E. *et al.* A tunable, biodegradable, thin-film polymer device as a long-acting  
568 implant delivering tenofovir alafenamide fumarate for HIV pre-exposure prophylaxis.  
569 *Pharm. Res.* **33**, 1649–1656 (2016).
- 570 9. Johnson, L. M. *et al.* Characterization of a Reservoir-Style Implant for Sustained Release  
571 of Tenofovir Alafenamide (TAF) for HIV Pre-Exposure Prophylaxis (PrEP).  
572 *Pharmaceutics* **11**, 315 (2019).

- 573 10. Chua, C. Y. X. *et al.* Transcutaneously refillable nanofluidic implant achieves sustained  
574 level of tenofovir diphosphate for HIV pre-exposure prophylaxis. *J. Control. Release* **286**,  
575 315–325 (2018).
- 576 11. Intarcia Therapeutics. Medici System Pipeline. [https://www.intarcia.com/pipeline-](https://www.intarcia.com/pipeline-technology/itca-650.html)  
577 [technology/itca-650.html](https://www.intarcia.com/pipeline-technology/itca-650.html).
- 578 12. Su, J. T. *et al.* A Subcutaneous Implant of Tenofovir Alafenamide Fumarate Causes Local  
579 Inflammation and Tissue Necrosis in Rabbits and Macaques. *Antimicrob. Agents*  
580 *Chemother.* (2019) doi:10.1128/AAC.01893-19.
- 581 13. Pons-Faudoa, F. P. *et al.* 2-Hydroxypropyl- $\beta$ -cyclodextrin-enhanced pharmacokinetics of  
582 cabotegravir from a nanofluidic implant for HIV pre-exposure prophylaxis. *J. Control.*  
583 *Release* **306**, 89–96 (2019).
- 584 14. Boyd, M. A. & Cooper, D. A. Long-acting injectable ART: next revolution in HIV?  
585 *Lancet* **390**, 1468–1470 (2017).
- 586 15. Clement, M. E., Kofron, R. & Landovitz, R. J. Long-acting injectable cabotegravir for the  
587 prevention of HIV infection. *Curr. Opin. HIV AIDS* **15**, 19–26 (2020).
- 588 16. Pons-Faudoa, F. P., Ballerini, A., Sakamoto, J. & Grattoni, A. Advanced implantable drug  
589 delivery technologies: transforming the clinical landscape of therapeutics for chronic  
590 diseases. *Biomed. Microdevices* **21**, 47 (2019).
- 591 17. Flexner, C. Antiretroviral implants for treatment and prevention of HIV infection. *Curr.*  
592 *Opin. HIV AIDS* **13**, 374–380 (2018).
- 593 18. Markowitz, M. *et al.* Safety and tolerability of long-acting cabotegravir injections in HIV-  
594 uninfected men (ECLAIR): a multicentre, double-blind, randomised, placebo-controlled,  
595 phase 2a trial. *Lancet HIV* **4**, e331–e340 (2017).

- 596 19. Landovitz, R. J. *et al.* Safety, tolerability, and pharmacokinetics of long-acting injectable  
597 cabotegravir in low-risk HIV-uninfected individuals: HPTN 077, a phase 2a randomized  
598 controlled trial. *PLOS Med.* **15**, e1002690 (2018).
- 599 20. Merck & Co. Press Release Details. [https://investors.merck.com/news/press-release-  
600 details/2019/Merck-Presents-Early-Evidence-on-Extended-Delivery-of-Investigational-  
601 Anti-HIV-1-Agent-Islatravir-MK-8591-via-Subdermal-Implant/default.aspx](https://investors.merck.com/news/press-release-<br/>600 details/2019/Merck-Presents-Early-Evidence-on-Extended-Delivery-of-Investigational-<br/>601 Anti-HIV-1-Agent-Islatravir-MK-8591-via-Subdermal-Implant/default.aspx) (2019).
- 602 21. Gated Nanofluidic Valve For Active And Passive Electrosteric Control Of Molecular  
603 Transport, And Methods Of Fabrication, U.S. Provisional Pat. Ser. No. 62/961,437, filed  
604 Jan 15. (2020). (2020).
- 605 22. Oliveros, A., Guiseppi-Elie, A. & Sadow, S. E. Silicon carbide: a versatile material for  
606 biosensor applications. *Biomed. Microdevices* **15**, 353–368 (2013).
- 607 23. Zorman, C. A. *et al.* Amorphous Silicon Carbide as a Non-Biofouling Structural Material  
608 for Biomedical Microdevices. *Mater. Sci. Forum* **717–720**, 537–540 (2012).
- 609 24. Di Trani, N., Pimpinelli, A. & Grattoni, A. Finite-Size Charged Species Diffusion and pH  
610 Change in Nanochannels. *ACS Appl. Mater. Interfaces* **12**, 12246–12255 (2020).
- 611 25. Bruno, G. *et al.* Unexpected behaviors in molecular transport through size-controlled  
612 nanochannels down to the ultra-nanoscale. *Nat. Commun.* **9**, 1682 (2018).
- 613 26. Ferrati, S. *et al.* Leveraging nanochannels for universal, zero-order drug delivery in vivo.  
614 *J. Control. Release* **172**, 1011–1019 (2013).
- 615 27. Di Trani, N. *et al.* Nanofluidic microsystem for sustained intraocular delivery of  
616 therapeutics. *Nanomedicine Nanotechnology, Biol. Med.* **16**, 1–9 (2019).
- 617 28. Di Trani, N. *et al.* Remotely controlled nanofluidic implantable platform for tunable drug  
618 delivery. *Lab Chip* **19**, 2192–2204 (2019).

- 619 29. Massud, I. *et al.* Efficacy of Oral Tenofovir Alafenamide/Emtricitabine Combination or  
620 Single-Agent Tenofovir Alafenamide Against Vaginal Simian Human Immunodeficiency  
621 Virus Infection in Macaques. *J. Infect. Dis.* **220**, 1826–1833 (2019).
- 622 30. Anderson, P. L., García-Lerma, J. G. & Heneine, W. Non-daily pre-exposure prophylaxis  
623 for HIV prevention. *Curr. Opin. HIV AIDS* **11**, 94–101 (2016).
- 624 31. Subbarao, S. *et al.* Chemoprophylaxis with Tenofovir Disoproxil Fumarate Provided  
625 Partial Protection against Infection with Simian Human Immunodeficiency Virus in  
626 Macaques Given Multiple Virus Challenges. *J. Infect. Dis.* **194**, 904–911 (2006).
- 627 32. Baeten, J. M. *et al.* Single-agent tenofovir versus combination emtricitabine plus tenofovir  
628 for pre-exposure prophylaxis for HIV-1 acquisition: an update of data from a randomised,  
629 double-blind, phase 3 trial. *Lancet Infect. Dis.* **14**, 1055–1064 (2014).
- 630 33. Anderson, P. L. *et al.* Intracellular Tenofovir-Diphosphate and Emtricitabine-Triphosphate  
631 in Dried Blood Spots following Directly Observed Therapy. *Antimicrob. Agents*  
632 *Chemother.* **62**, 1710–1727 (2017).
- 633 34. Garcia-Lerma, J. G. *et al.* Natural Substrate Concentrations Can Modulate the  
634 Prophylactic Efficacy of Nucleotide HIV Reverse Transcriptase Inhibitors. *J. Virol.* **85**,  
635 6610–6617 (2011).
- 636 35. Xiao, P. *et al.* Hypo-osmolar Formulation of Tenofovir (TFV) Enema Promotes Uptake  
637 and Metabolism of TFV in Tissues, Leading to Prevention of SHIV/SIV Infection.  
638 *Antimicrob. Agents Chemother.* **62**, (2017).
- 639 36. Weld, E., Fuchs, E. & Marzinke, M. Conference Reports for NATAP: Tenofovir Rectal  
640 Douche Provides Protective Drug Levels in MSM Colon Tissue - on-demand,  
641 behaviorally-congruent. [http://www.natap.org/2018/HIVR4P/HIVR4P\\_26.htm](http://www.natap.org/2018/HIVR4P/HIVR4P_26.htm) (2018).

- 642 37. Fine, D. *et al.* A robust nanofluidic membrane with tunable zero-order release for  
643 implantable dose specific drug delivery. *Lab Chip* **10**, 3074 (2010).
- 644 38. Bushman, L. R. *et al.* Determination of nucleoside analog mono-, di-, and tri-phosphates  
645 in cellular matrix by solid phase extraction and ultra-sensitive LC–MS/MS detection. *J.*  
646 *Pharm. Biomed. Anal.* **56**, 390–401 (2011).
- 647 39. Hummert, P., Parsons, T. L., Ensign, L. M., Hoang, T. & Marzinke, M. A. Validation and  
648 implementation of liquid chromatographic-mass spectrometric (LC–MS) methods for the  
649 quantification of tenofovir prodrugs. *J. Pharm. Biomed. Anal.* **152**, 248–256 (2018).
- 650 40. U.S. Department of Health and Human Services Food and Drug Administration, Center  
651 for Drug Evaluation and Research (CDER) & Center for Veterinary Medicine (CVM).  
652 *Guidance for Industry: Bioanalytical Method Validation.* (FDA, 2018).
- 653 41. Shieh, E. *et al.* Transgender women on oral HIV pre-exposure prophylaxis have  
654 significantly lower tenofovir and emtricitabine concentrations when also taking oestrogen  
655 when compared to cisgender men. *J. Int. AIDS Soc.* **22**, (2019).
- 656 42. García-Lerma, J. G. *et al.* Prevention of Rectal SHIV Transmission in Macaques by Daily  
657 or Intermittent Prophylaxis with Emtricitabine and Tenofovir. *PLoS Med.* **5**, e28 (2008).
- 658 43. Biesinger, T. *et al.* Relative replication capacity of phenotypic SIV variants during  
659 primary infections differs with route of inoculation. *Retrovirology* **7**, 88 (2010).
- 660 44. Polacino, P. *et al.* Immunogenicity and protective efficacy of Gag/Pol/Env vaccines  
661 derived from temporal isolates of SIV<sub>mne</sub> against cognate virus challenge. *J. Med.*  
662 *Primatol.* **36**, 254–265 (2007).
- 663 45. Zhang, Y., Huo, M., Zhou, J. & Xie, S. PKSolver: An add-in program for pharmacokinetic  
664 and pharmacodynamic data analysis in Microsoft Excel. *Comput. Methods Programs*

665 *Biomed.* **99**, 306–314 (2010).

666

## 667 **Acknowledgements**

668 We thank Dr. Andreana L. Rivera, Yuelan Ren, and Sandra Steptoe from the research pathology  
669 core of Houston Methodist Research Institute. Dr. Jianhua “James” Gu from the electron  
670 microscopy core. We thank Simone Capuani from the Houston Methodist Research Institute for  
671 implant design and rendering, Dixita Viswanath for help with tissue dissection, and Nicola Di  
672 Trani for obtaining FIB image. We thank Luke Segura, Elizabeth Lindemann and Dr. Greg  
673 Wilkerson from the Michale E. Keeling Center for Comparative medicine and Research at  
674 UTMDACC for support in animal studies and Bharti Nehete for plasma and PBMC isolation and  
675 virus challenge preparation. TAF fumarate was provided by Gilead Sciences. **Funding:** This  
676 work was supported by funding from the National Institutes of Health National Institute of  
677 Allergy and Infectious Diseases (R01AI120749; A.G.), the National Institutes of Health National  
678 Institute of General Medical Sciences (R01GM127558; A.G.) and Gilead Sciences (A.G.).  
679 Additional support from Frank J. and Jean Raymond Centennial Chair Endowment (A.G.). F.P.P.  
680 received funding support from Tecnológico de Monterrey and Consejo Nacional de Ciencia y  
681 Tecnología.

682

## 683 **Author contributions**

684 **Fernanda P. Pons-Faudoa:** conceptualization, formal analysis, investigation, writing-original  
685 draft preparation, writing-review and editing, visualization, project administration. **Antons**  
686 **Sizovs:** conceptualization, methodology, formal analysis, investigation, writing-review and  
687 editing, visualization. **Kathryn A. Shelton:** investigation. **Zoha Momin:** investigation. **Corrine**

688 **Y. X. Chua:** formal analysis, writing-review and editing. **Lane R. Bushman:** methodology,  
689 validation, investigation. **Joan E. Nichols:** methodology, investigation, resources, writing-  
690 reviewing and editing. **Trevor Hawkins:** conceptualization, writing-review and editing. **James**  
691 **F. Rooney:** conceptualization, writing-review and editing. **Mark A. Marzinke:** methodology,  
692 validation, investigation, resources, data curation, writing-review and editing. **Jason T. Kimata:**  
693 validation, investigation, resources, writing-review and editing. **Peter L. Anderson:**  
694 methodology, validation, resources, writing-review and editing. **Pramod N. Nehete:**  
695 investigation, resources, project administration, writing-review and editing. **Roberto C.**  
696 **Arduino:** conceptualization, writing-review and editing. **Mauro Ferrari:** writing-review and  
697 editing. **K. Jagannadha Sastry:** conceptualization, resources, writing-review and editing.  
698 **Alessandro Grattoni:** conceptualization, investigation, resources, writing-original draft  
699 preparation, writing-review and editing, visualization, supervision, project administration,  
700 funding acquisition.

701

## 702 **Competing interests**

703 Study drugs were provided by Gilead Sciences. P.L.A. receives grants and contracts from Gilead  
704 Sciences paid to his institution and collects personal fees from Gilead Sciences. T.H. is an  
705 employee of Gilead Sciences. J.F.R. is an employee and stockholder of Gilead Sciences. All  
706 other authors declare that they have no competing interests.

707

708 **Correspondence and requests for materials** should be addressed to A.G. or M.F.

709

710

| Analyte                     | NHP<br>PrEP<br>5 | NHP<br>PrEP<br>6 | NHP<br>PrEP<br>7 | Average | Standard<br>deviation |
|-----------------------------|------------------|------------------|------------------|---------|-----------------------|
| Plasma TAF $t_{1/2}$ (days) | <2.24            | <1.71            | <1.67            | <1.87   | $\pm 0.32$            |
| Plasma TFV $t_{1/2}$ (days) | <2.55            | <1.61            | <1.35            | <1.84   | $\pm 0.63$            |
| PBMC TFV-DP k10 (1/day)     | 0.18             | 0.13             | 0.13             | 0.14    | $\pm 0.028$           |

711 **Table 1.** Plasma TAF and TFV half-lives and PBMC TFV-DP elimination rate constant  
712 pharmacokinetics in nTAF washout NHPs.



713

| NHP<br>PrEP | TAF loaded<br>(mg) | Residual TAF* (mg) | TAF<br>stability (%) | TAF release rate<br>(mg/day) |
|-------------|--------------------|--------------------|----------------------|------------------------------|
| 1           | 341.50             | 161.87             | 30.76                | 1.60                         |
| 2           | 330.10             | 217.65             | 12.28                | 1.00                         |
| 3           | 337.10             | 215.57             | 18.21                | 1.09                         |
| 4           | 382.10             | 241.01             | 31.78                | 1.26                         |
| 5           | 457.60             | 325.43             | 43.08                | 1.18                         |
| 6           | 449.30             | 279.46             | 18.70                | 1.52                         |
| 7           | 342.60             | 105.34             | 22.26                | 2.12                         |

714 **Table 2.** Residual drug analysis from nTAF implants at explantation via high performance liquid  
715 chromatography (HPLC) and UV-Vis spectroscopy.

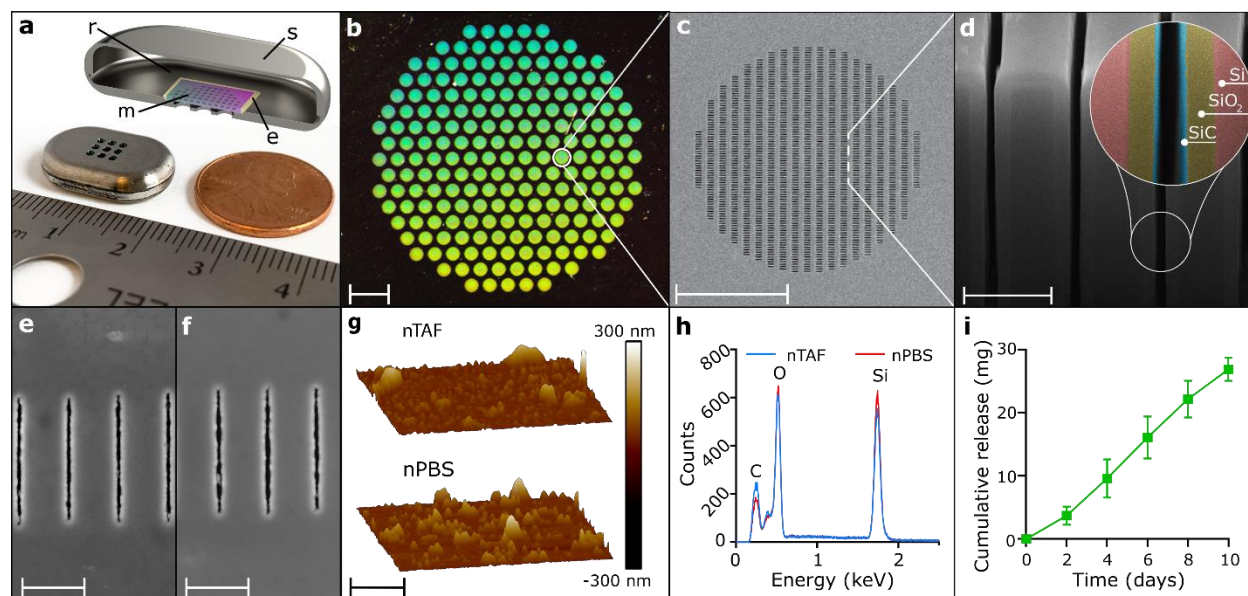

730

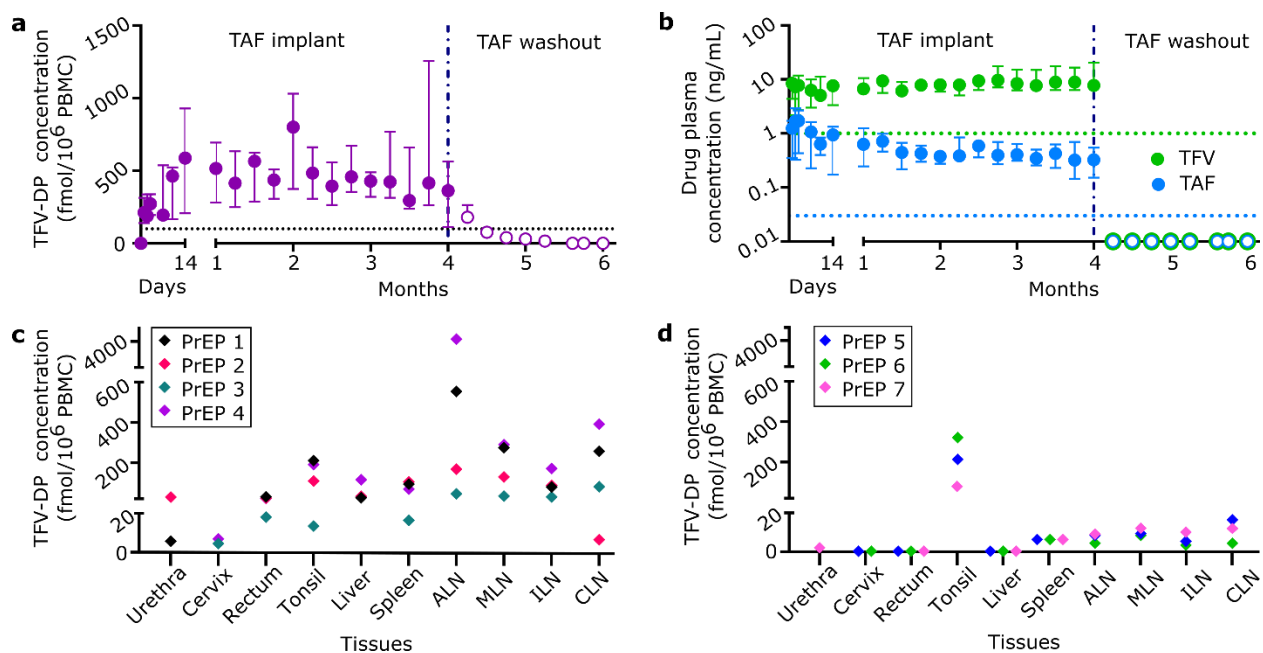

731

732 **Fig. 2.** Pharmacokinetics and tissue distribution of TAF from PrEP group implanted with  
 733 subcutaneous nTAF. nTAF implants (n=7) were retrieved after 4 months and washout  
 734 concentrations (open circles) were followed in 3 animals. **a**, Intracellular TFV-DP PBMC  
 735 concentrations of PrEP cohort throughout the study. Dotted black horizontal line represents  
 736 target preventive TFV-DP PBMC concentration of 100.00 fmol/10<sup>6</sup> cells. **b**, TAF and TFV  
 737 concentrations in the plasma of PrEP cohort throughout the study. Green and blue dotted  
 738 horizontal lines represent lower LOQ TFV and TAF concentrations, 1.00 ng/mL and 0.03  
 739 ng/mL, respectively. **c**, Tissue TFV-DP concentrations upon nTAF removal after 4 months of  
 740 implantation in a subset of animals (n=4). **d**, Tissue TFV-DP levels after the 2-month washout  
 741 period in a subset of animals (n=3). Data are presented as median ± IQR in panels A and B.

742 **Source Data**

743

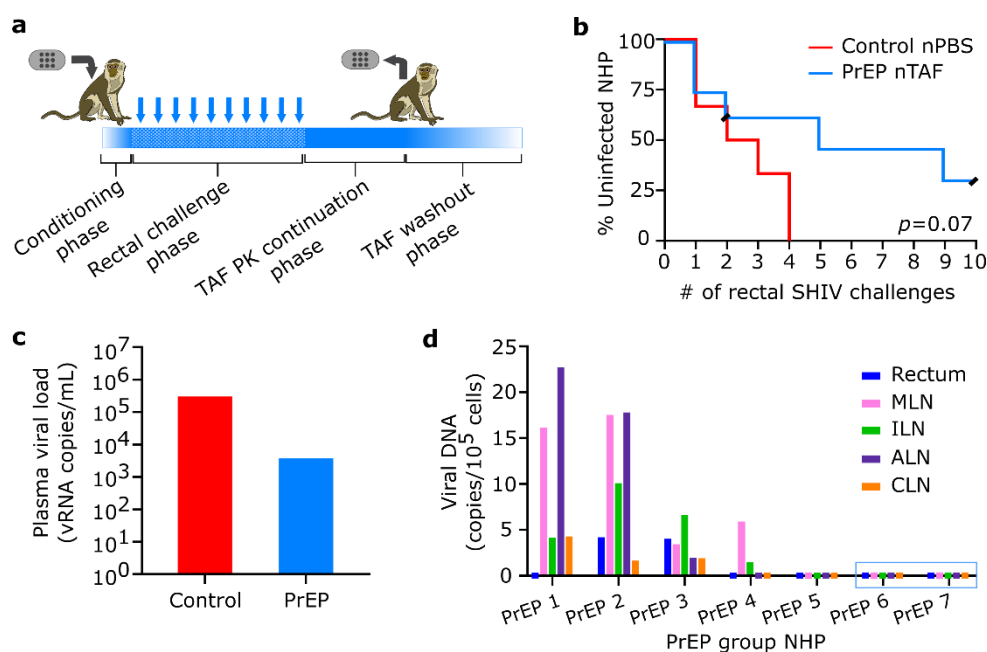

744

745 **Fig. 3.** PrEP efficacy of nTAF. **a**, Schematic of study design. Conditioning phase to reach TFV-  
 746 DP PBMC concentrations above  $100 \text{ fmol}/10^6$  cells. Rectal challenge phase with up to 10 weekly  
 747 low-dose SHIV<sub>SF162P3</sub> exposures. TAF PK continuation phase followed by nTAF explantation  
 748 from all animals and euthanasia of 4 animals. TAF washout was observed in the remaining 3  
 749 animals for 2 months prior to euthanasia. **b**, Kaplan-Meier curve representing the percentage of  
 750 infected animals as a function of weekly SHIV exposure. PrEP (n=8) vs control (n=6) group;  
 751 censored animals represented with black slash. Statistical analysis by Mantel-Cox test. **c**, Median  
 752 peak viremia levels in breakthrough animals at initial viral load detection. **d**, Cell-associated  
 753 viral DNA loads of tissues in PrEP group. Animals PrEP 1-5 were infected while PrEP 6 and 7  
 754 (blue box) remained uninfected throughout the study. MLN, mesenteric lymph nodes, ILN,  
 755 inguinal lymph nodes, ALN, axillary lymph nodes, CLN, cervical lymph nodes. **Source Data**



756

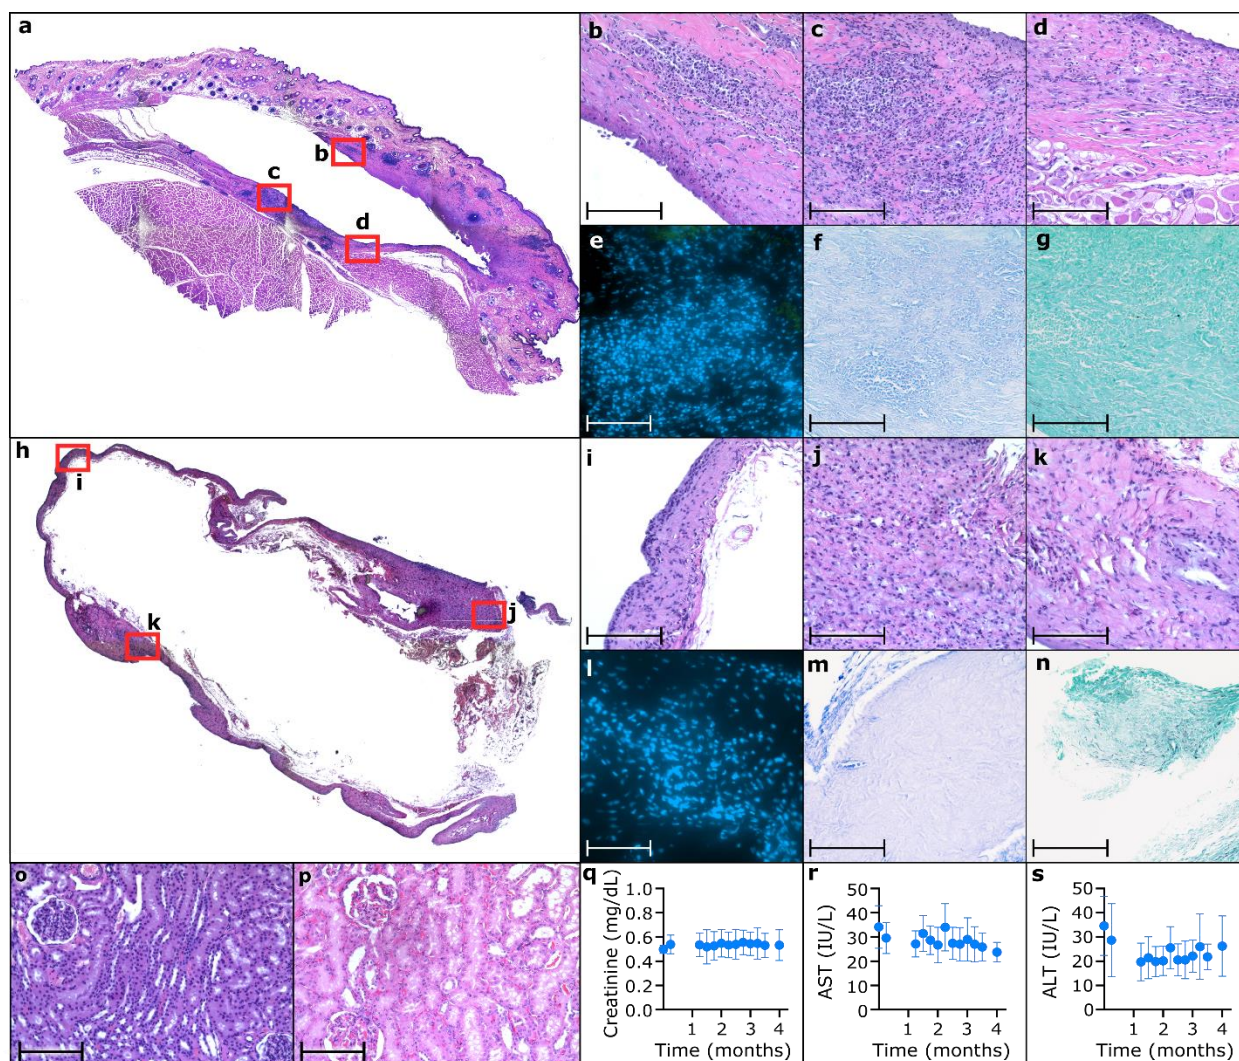

757

758 **Fig. 4.** Histological inflammatory response to nTAF and control nPBS; and toxicology  
759 assessment of nTAF in the kidney and liver. **a**, Representative H&E stain of NHP skin  
760 surrounding PrEP nTAF, with **b**, fibrotic capsule in contact with titanium implant; 20 ×  
761 magnification. Fibrotic capsule in contact with TAF-releasing membrane was assessed via **c**, **d**,  
762 H&E, 20 × magnification; **e**, immunofluorescence staining of CD45 (green) and DAPI nuclear  
763 stain (blue), 100 × magnification; **f**, AFB staining for presence of bacteria, 20 × magnification;  
764 and **g**, Grocott methenamine silver staining for presence of fungi, 20 × magnification. **h**,  
765 Representative H&E stain of NHP skin surrounding control nPBS. Fibrotic capsule in contact

766 with titanium implant was assessed via **i, j, k**, H&E, 20 × magnification, **l**, immunofluorescence  
767 staining of CD45 (green) and DAPI nuclear stain (blue), 100 × magnification; **m**, AFB staining  
768 for presence of bacteria, 20 × magnification; and **n**, Grocott methenamine silver staining for  
769 presence of fungi, 20 × magnification. **o**, Representative H&E stain of kidney from PrEP nTAF  
770 group demonstrating normal histology, in comparison to **p**, representative H&E stain of kidney  
771 from control NHP similarly showing no nephrotoxicity; 20 × magnification. **q**, Creatinine  
772 activity measurements from nTAF cohort. Liver enzymes, **r**, aspartate aminotransferase (AST),  
773 and **s**, alanine aminotransferase (ALT) from nTAF cohort. Baseline levels (0 month) were  
774 measured before implantation of nTAF. All data are presented as mean ± SD (n=7). Images **a**  
775 and **h** taken at 4 × magnification and stitched together. Scale bar in 20 and 100 × magnification  
776 is 200 and 10 μm, respectively. **Sources Data**
